# Supplementary material
Source: publisher site journal article supplement (https://www.spandidos-publications.com/1195/downloadSupplementary)

Figure S1. Cell viability is measured using the MTT assay. TSD at concentrations of 0.1-30  $\mu\text{g/ml}$  for (A) 48 or (B) 72 h. MSU and TSD were dissolved in PBS. Data are expressed as the mean  $\pm$  standard deviation. These data are representative of three independent experiments. \*\* $P < 0.01$  vs. non-treated control cells (generated using one-way analysis of variance). MSU, monosodium urate; TSD, total saponins extracted from *Dioscorea collettii*.

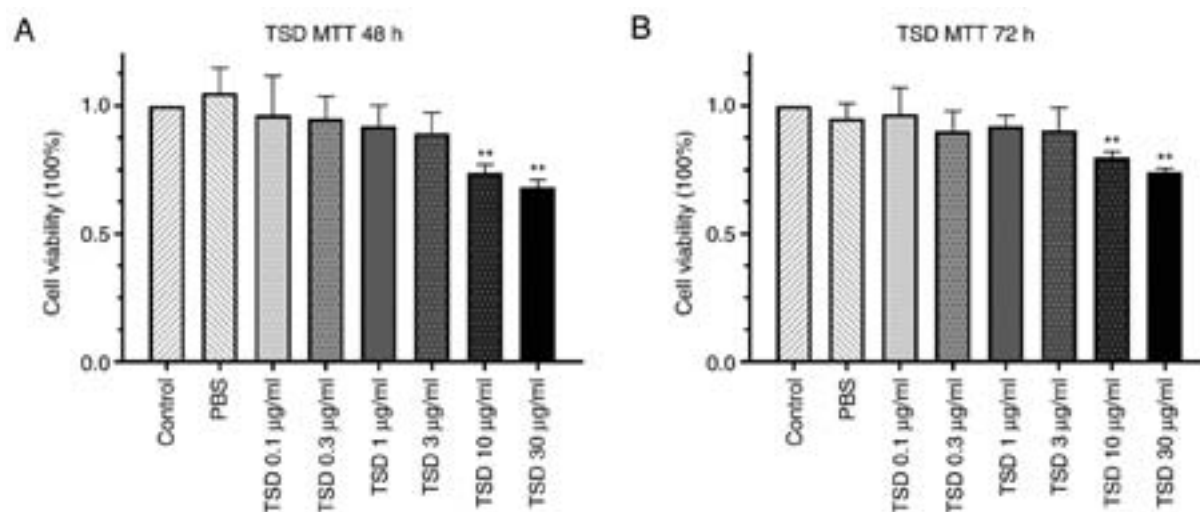

Supplement: Supplementary file 1 [file downloadSupplementary]
